# Supplementary material for: Hydrazone-based cobalt complexes toward multielectron redox and spin crossover
Source: Royal Society of Chemistry journal article supplement (doi:10.1039/c8ra02963f), 2018-01-01
Supplement: c8ra02963f1.pdf [file c8ra02963f1.pdf]

*Supporting Information for*

## **Hydrozone-based Cobalt Complexes Toward Multielectron Redox and Spin Crossover**

Wei Huang, Yujie Li, Juan Yong, Yang Liu and Dayu Wu\*

Jiangsu Key Laboratory of Advanced Catalytic Materials and Technology,  
Collaborative Innovation Center of Advanced Catalysis & Green Manufacturing,  
School of Petrochemical Engineering, Changzhou University, Changzhou, Jiangsu  
213164, China.

Email: wudy@cczu.edu.cn.

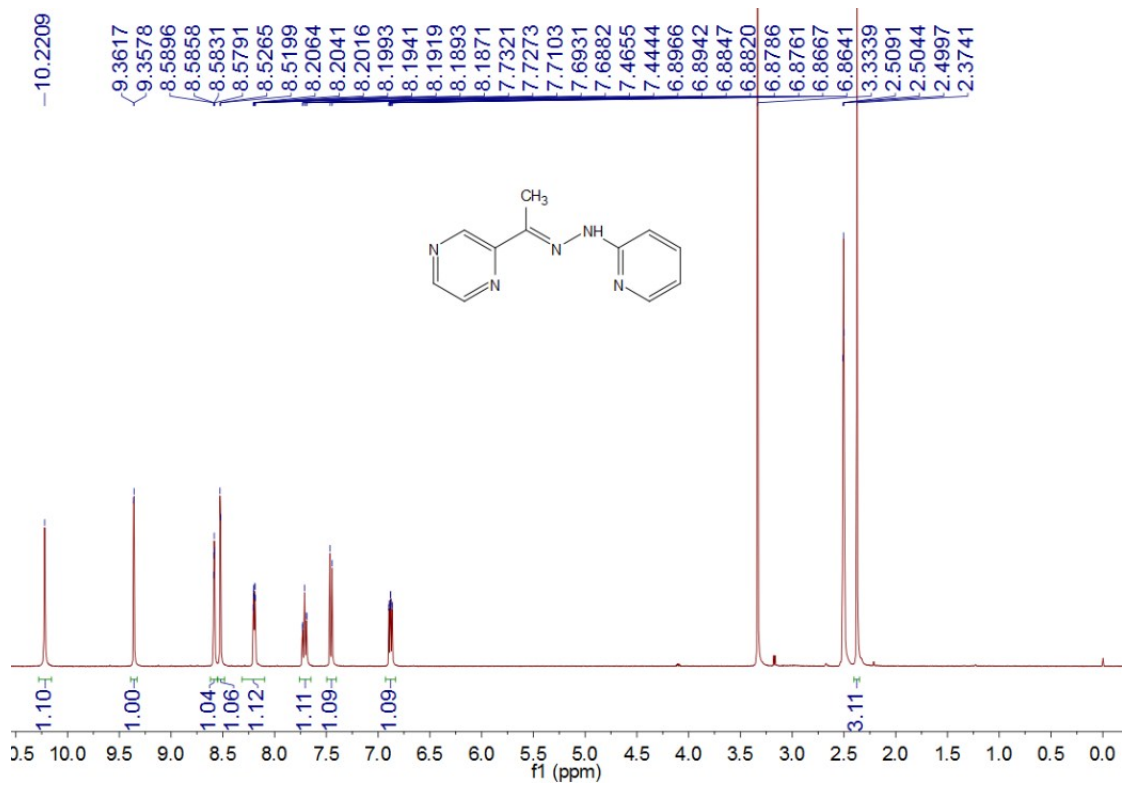

**Fig. S1.** <sup>1</sup>H-NMR spectra of **HL1** (DMSO-d<sub>6</sub>)

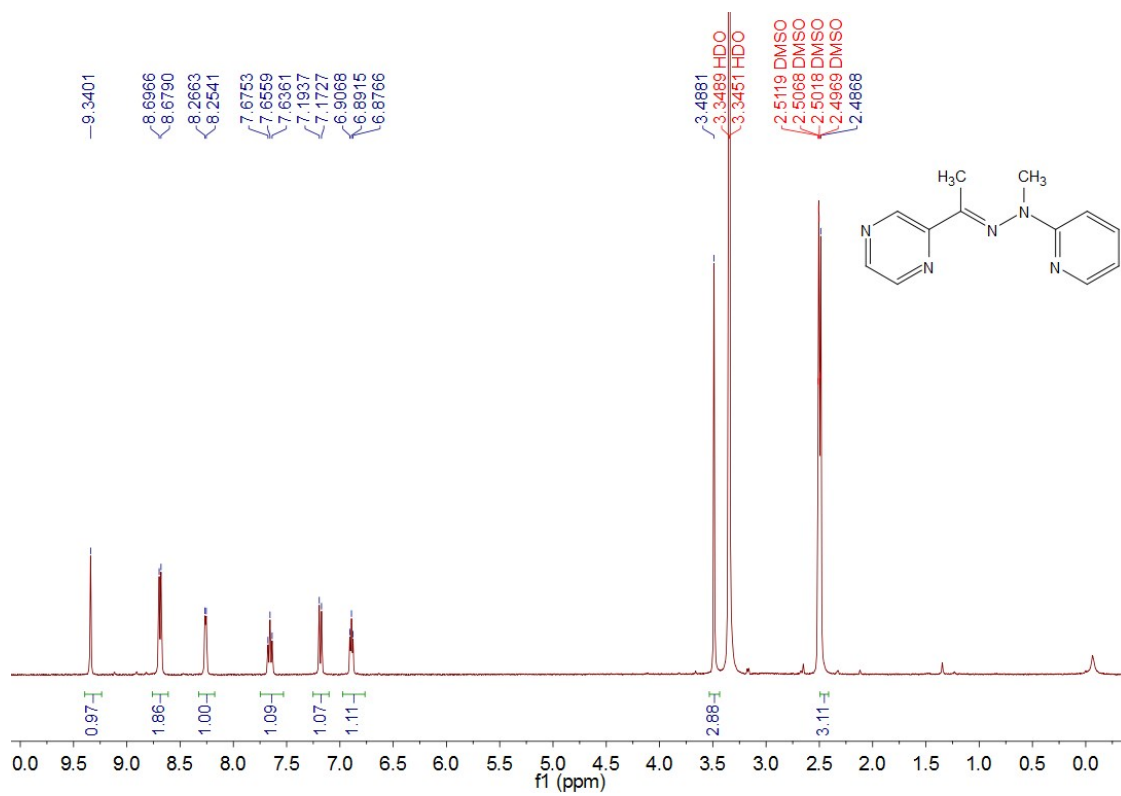

**Fig. S2.** <sup>1</sup>H-NMR spectra of L2<sup>Me</sup> (DMSO-d<sub>6</sub>)

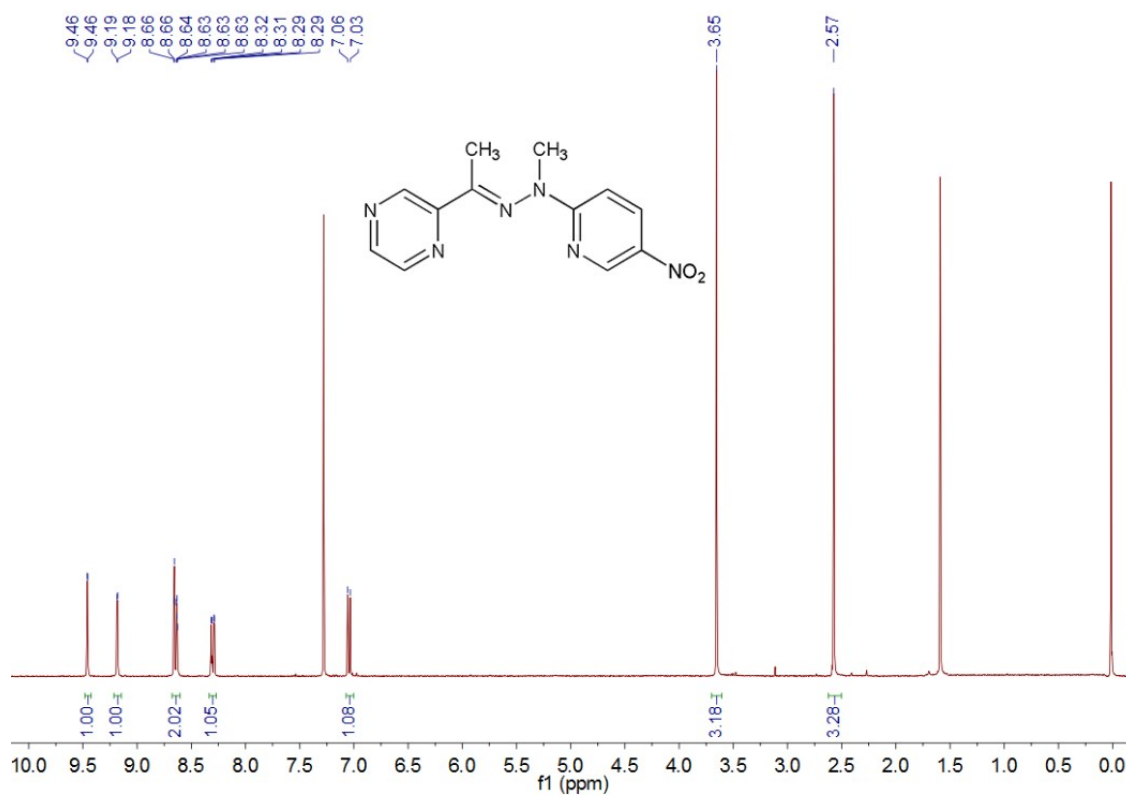

Fig. S3.  $^1H$ -NMR spectra of  $L3^{NO_2}$  (CDCl<sub>3</sub>)

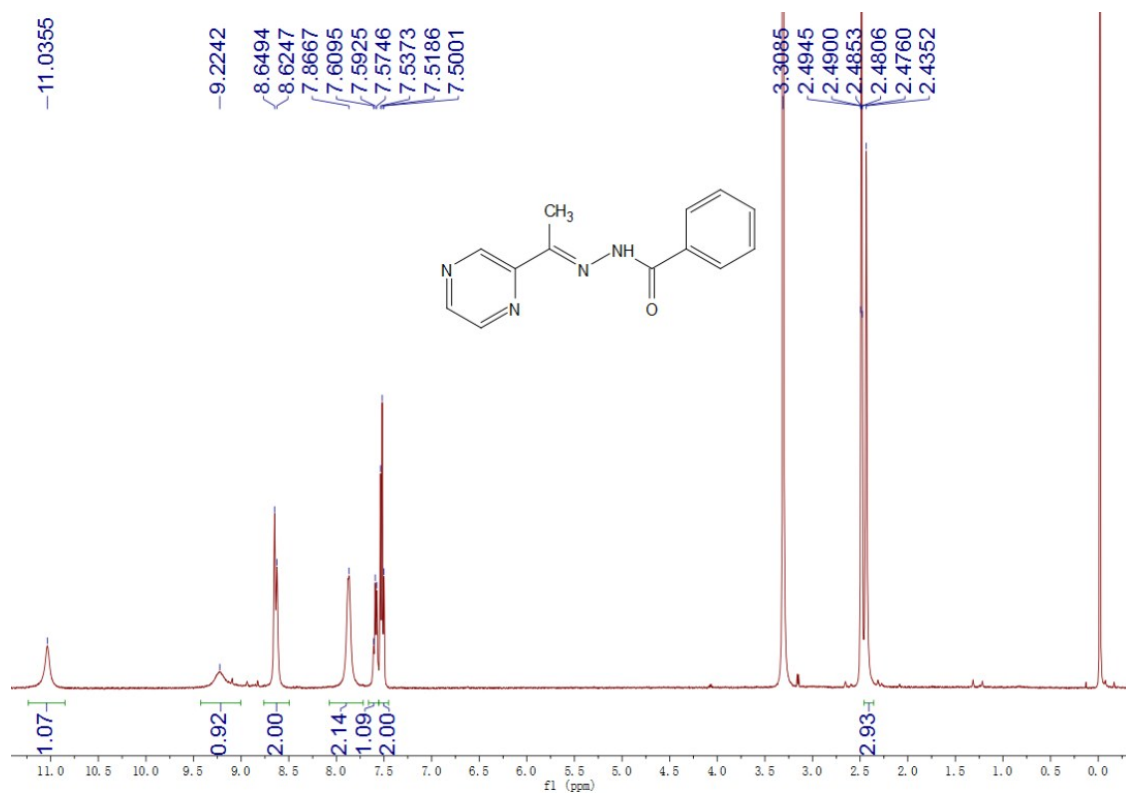

**Fig. S4.** <sup>1</sup>H-NMR spectra of HL4 (DMSO-d<sub>6</sub>).

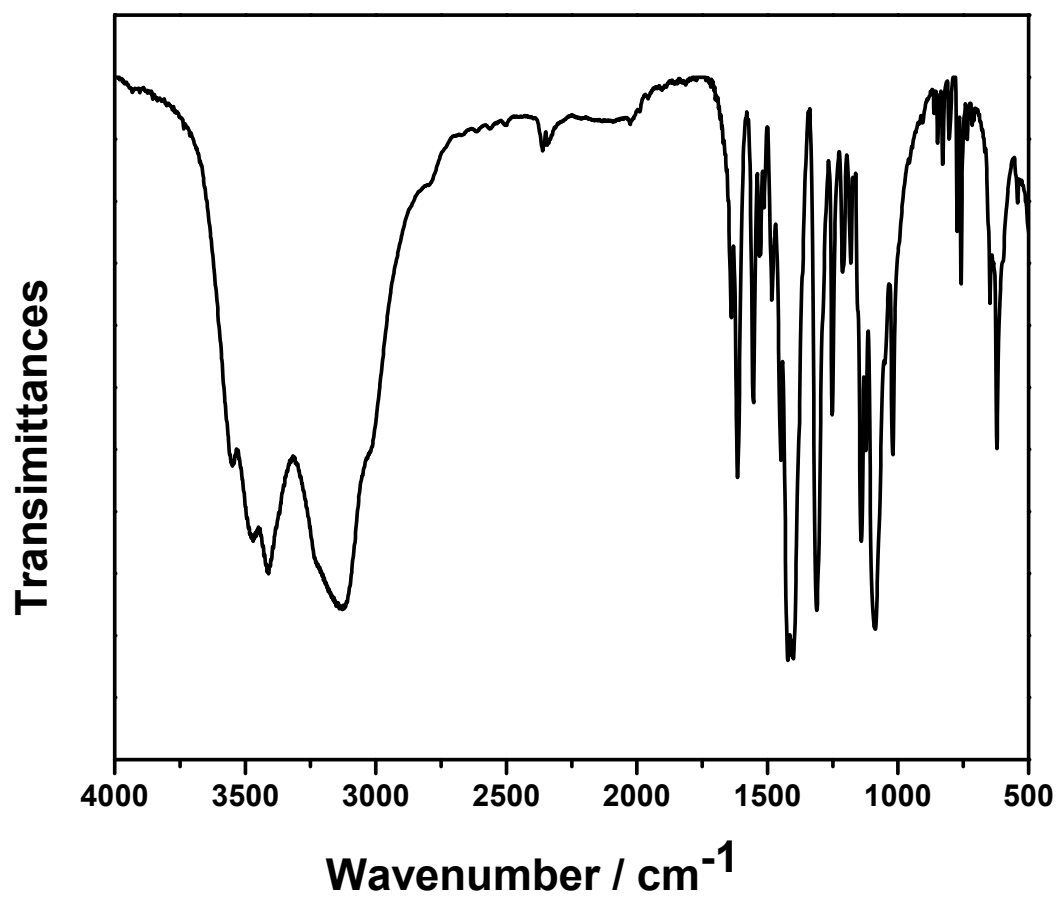

Fig. S5. IR spectrum of complex 1.

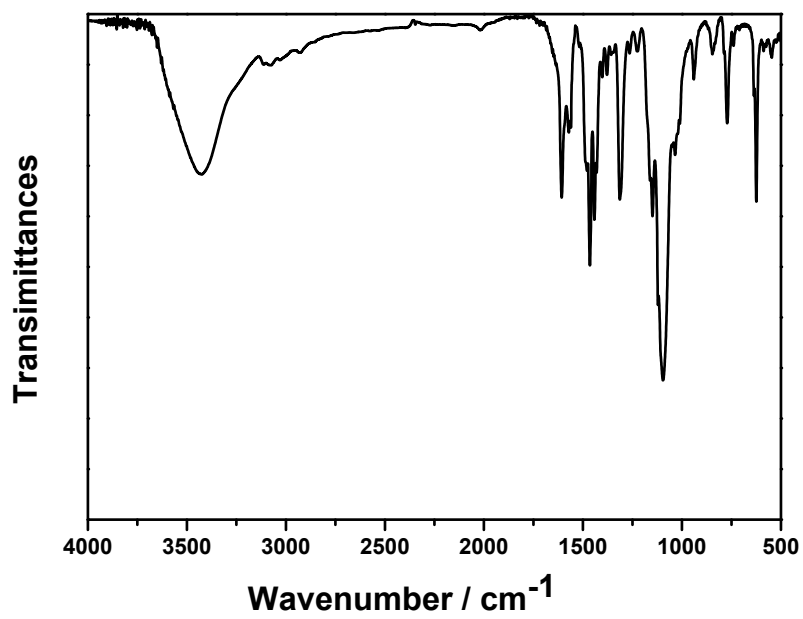

**Fig. S6.** IR spectrum of complex 2.

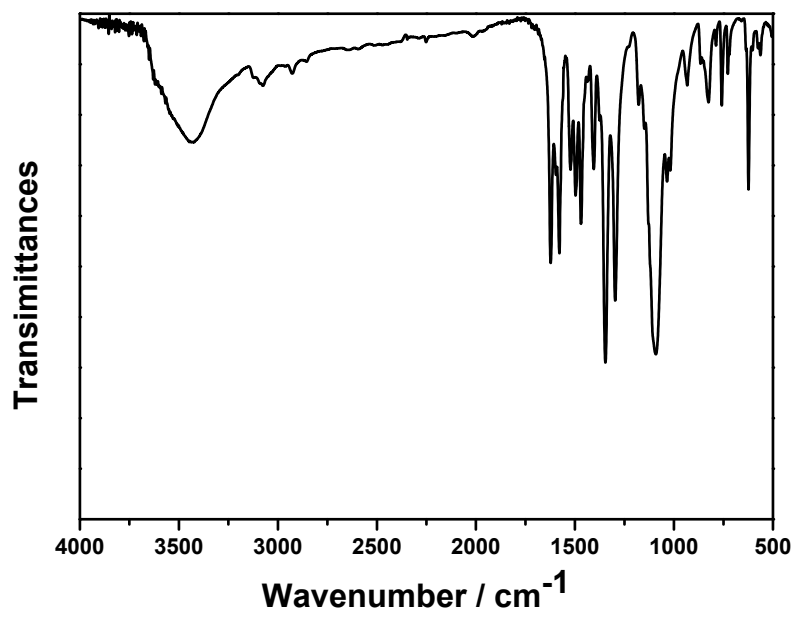

Fig. S7. IR spectrum of complex  $3\text{ClO}_4 \cdot \text{CH}_3\text{OH}$ .



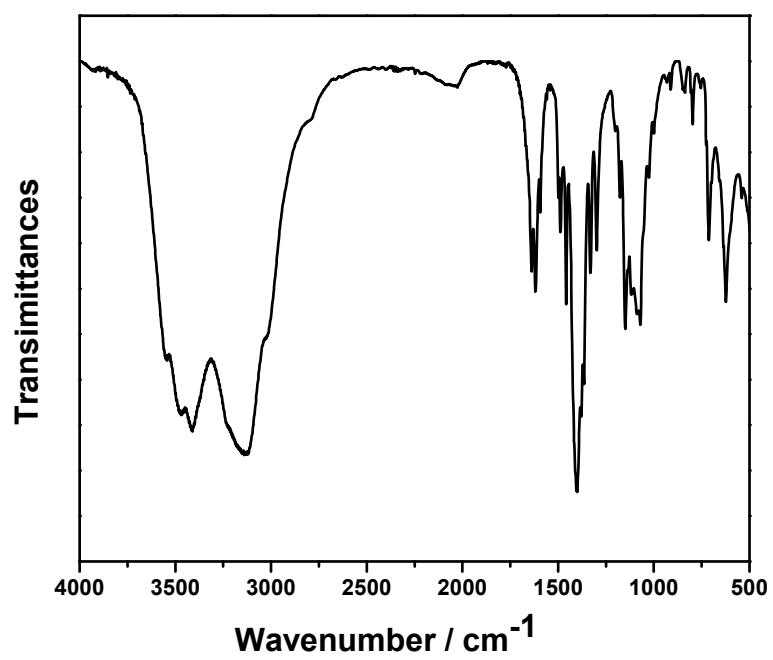

Fig. S8. IR spectrum of complex 4.

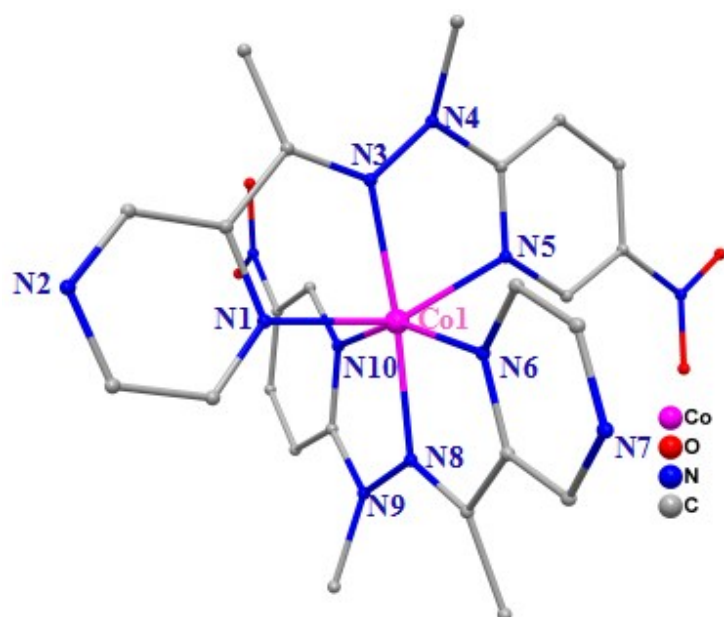

**Fig. S9.** Crystal structure of the compound  $3_{BF_4} \cdot 0.5CH_3OH$ .

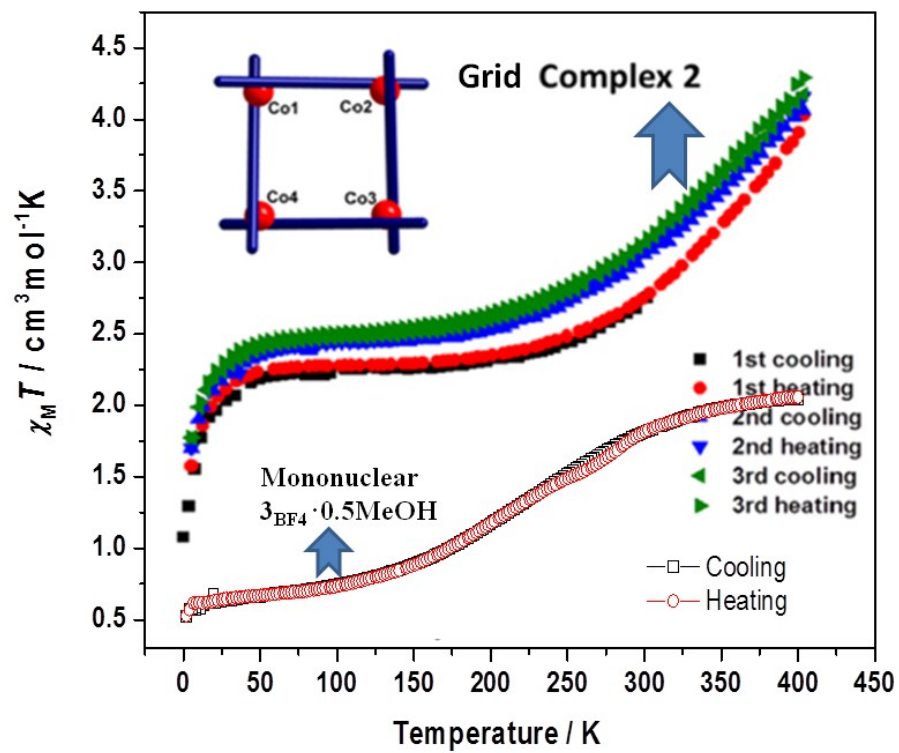

**Fig. S10.** The combined plot of magnetic data for mononuclear compound  $3_{\text{BF}_4}$  and the reported tetranuclear grid complex.

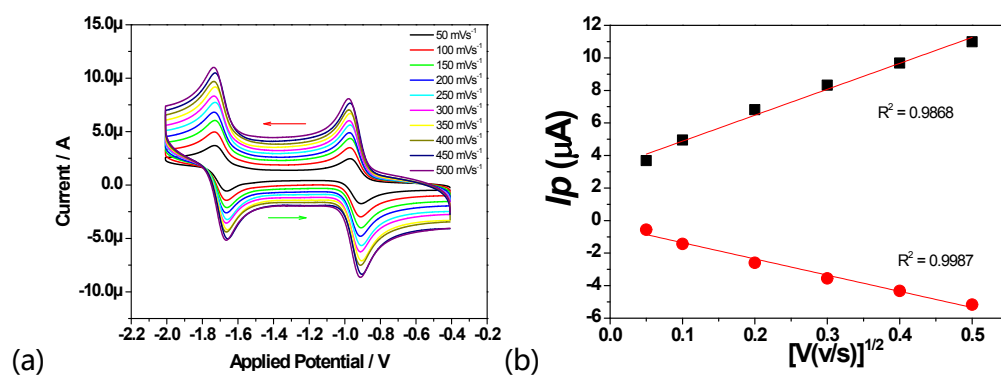

**Fig. S11.** (a) CV study of an acetonitrile solution of complex **1** (0.1 mM) referenced against  $\text{Fc}^+/\text{Fc}$ . (b) Plots of anodic and cathodic peak currents at redox process II versus the square root of the scan rates,  $v^{1/2}$ .

Table S1. Summary of Electrochemical Data for Cobalt(III) complex **1**.

| Scan rate( $\text{mVs}^{-1}$ ) | $\text{Co}^{3+/2+}$ |                      |            |                    | $\text{Co}^{2+/\pm}$ |                      |            |                    |
|--------------------------------|---------------------|----------------------|------------|--------------------|----------------------|----------------------|------------|--------------------|
|                                | $E_{\text{ox}}$ (v) | $E_{\text{red}}$ (v) | $\Delta E$ | $E_{\text{m}}$ (v) | $E_{\text{ox}}$ (v)  | $E_{\text{red}}$ (v) | $\Delta E$ | $E_{\text{m}}$ (v) |
| 50                             | -0.905              | -0.965               | 0.060      | -0.935             | -1.667               | -1.732               | 0.065      | -1.699             |
| 100                            | -0.923              | -0.974               | 0.051      | -0.948             | -1.672               | -1.741               | 0.069      | -1.706             |
| 150                            | -0.926              | -0.983               | 0.057      | -0.954             | -1.676               | -1.746               | 0.070      | -1.711             |
| 200                            | -0.931              | -0.985               | 0.054      | -0.958             | -1.676               | -1.746               | 0.070      | -1.711             |
| 250                            | -0.934              | -0.989               | 0.055      | -0.962             | -1.682               | -1.745               | 0.063      | -1.714             |
| 300                            | -0.936              | -0.992               | 0.056      | -0.964             | -1.668               | -1.744               | 0.076      | -1.706             |
| 350                            | -0.940              | -0.981               | 0.041      | -0.960             | -1.671               | -1.745               | 0.074      | -1.708             |
| 400                            | -0.942              | -0.986               | 0.044      | -0.964             | -1.672               | -1.748               | 0.076      | -1.710             |
| 450                            | -0.943              | -0.987               | 0.044      | -0.965             | -1.678               | -1.739               | 0.061      | -1.708             |
| 500                            | -0.948              | -0.989               | 0.041      | -0.968             | -1.673               | -1.742               | 0.069      | -1.708             |

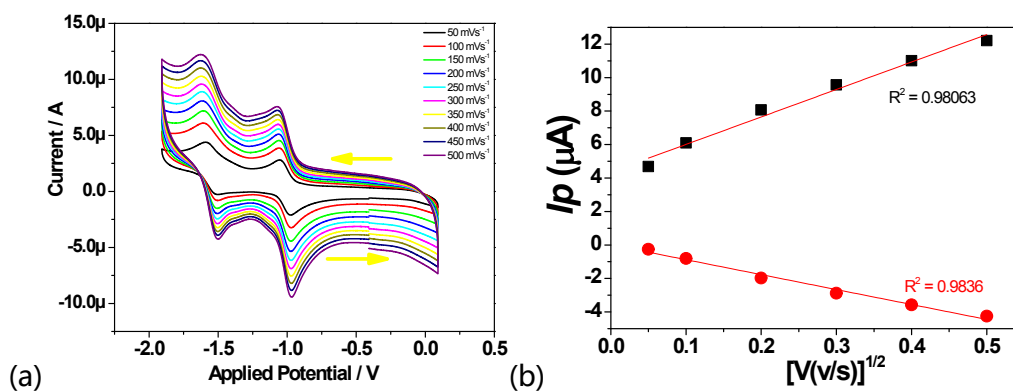

**Fig. S12.** (a) CV study of an acetonitrile solution of complex **2** (0.1 mM) referenced against  $\text{Fc}^+/\text{Fc}$ . (b) Plots of anodic and cathodic peak currents at redox process II versus the square root of the scan rates,  $v^{1/2}$ .

Table S2. Summary of Electrochemical Data for Cobalt(III) complex **2**.

| Scan rate( $\text{mVs}^{-1}$ ) | $\text{Co}^{3+/2+}$ |                      |            |                    | $\text{Co}^{2+/+}$  |                      |            |                    |
|--------------------------------|---------------------|----------------------|------------|--------------------|---------------------|----------------------|------------|--------------------|
|                                | $E_{\text{ox}}$ (v) | $E_{\text{red}}$ (v) | $\Delta E$ | $E_{\text{m}}$ (v) | $E_{\text{ox}}$ (v) | $E_{\text{red}}$ (v) | $\Delta E$ | $E_{\text{m}}$ (v) |
| 50                             | -0.976              | -1.061               | 0.085      | -1.018             | -1.520              | -1.594               | 0.074      | -1.557             |
| 100                            | -0.971              | -1.062               | 0.091      | -1.016             | -1.502              | -1.607               | 0.105      | -1.554             |
| 150                            | -0.971              | -1.064               | 0.093      | -1.018             | -1.504              | -1.609               | 0.105      | -1.556             |
| 200                            | -0.970              | -1.066               | 0.096      | -1.018             | -1.503              | -1.611               | 0.108      | -1.557             |
| 250                            | -0.969              | -1.065               | 0.096      | -1.017             | -1.502              | -1.619               | 0.117      | -1.560             |
| 300                            | -0.967              | -1.066               | 0.099      | -1.016             | -1.501              | -1.620               | 0.119      | -1.560             |
| 350                            | -0.965              | -1.067               | 0.102      | -1.016             | -1.500              | -1.622               | 0.122      | -1.561             |
| 400                            | -0.964              | -1.068               | 0.104      | -1.016             | -1.500              | -1.623               | 0.123      | -1.562             |
| 450                            | -0.964              | -1.070               | 0.106      | -1.017             | -1.499              | -1.628               | 0.129      | -1.564             |
| 500                            | -0.964              | -1.071               | 0.107      | -1.018             | -1.498              | -1.629               | 0.131      | -1.564             |

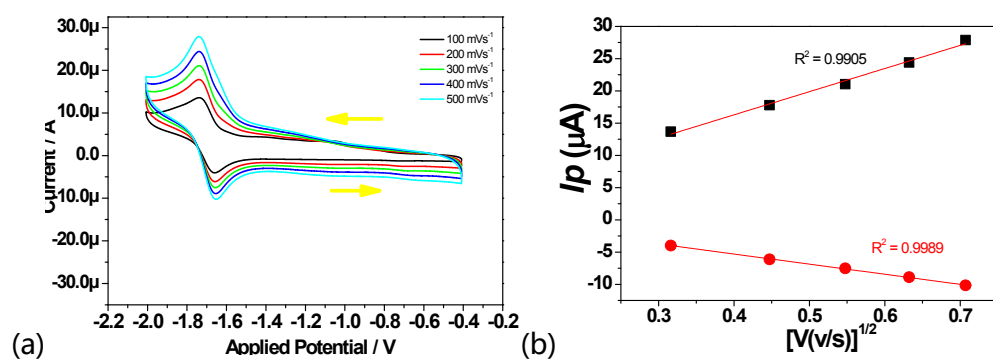

**Fig. S13.** (a) CV study of an acetonitrile solution of Complex  $3_{C104}$  (0.1 mM) referenced against  $Fc^+/Fc$ . (b) Plots of anodic and cathodic peak currents at redox process II versus the square root of the scan rates,  $v^{1/2}$ .

Table S3. Summary of Electrochemical Data for Cobalt(III) complex  $3_{C104}$ .

| Scan rate(mVs <sup>-1</sup> ) | Co <sup>2+/+</sup>  |                      |       |                    |
|-------------------------------|---------------------|----------------------|-------|--------------------|
|                               | E <sub>ox</sub> (v) | E <sub>red</sub> (v) | ΔE    | E <sub>m</sub> (v) |
| 100                           | -1.660              | -1.738               | 0.078 | -1.699             |
| 200                           | -1.657              | -1.739               | 0.082 | -1.698             |
| 300                           | -1.653              | -1.739               | 0.086 | -1.696             |
| 400                           | -1.652              | -1.740               | 0.088 | -1.696             |
| 500                           | -1.651              | -1.740               | 0.089 | -1.696             |

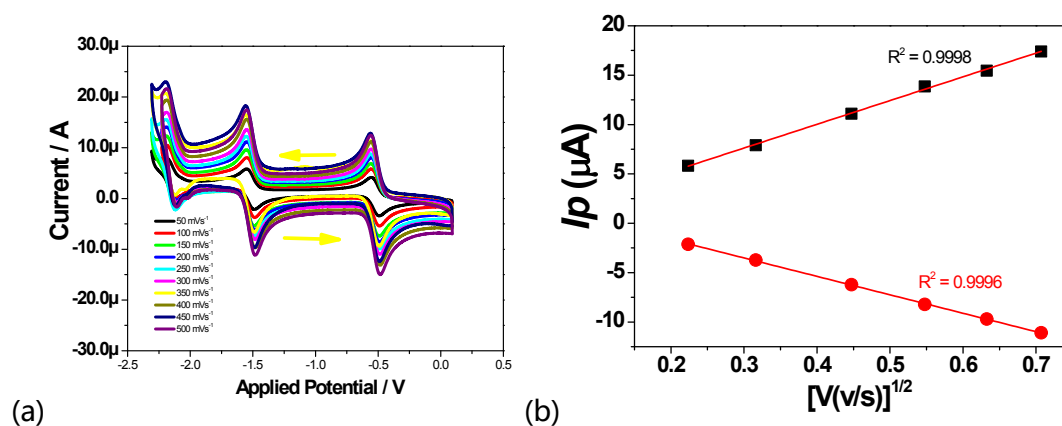

**Fig. S14.** (a) CV study of an acetonitrile solution of complex **4** (0.1 mM) referenced against  $\text{Fc}^+/\text{Fc}$ . (b) Plots of anodic and cathodic peak currents at redox process II versus the square root of the scan rates,  $v^{1/2}$ .

Table S4. Summary of Electrochemical Data for Cobalt(III) complex **4**.

| Scan rate( $\text{mVs}^{-1}$ ) | $\text{Co}^{3+/2+}$  |                     |            |                    | $\text{Co}^{2+/+}$   |                     |            |                    | Ligand-base          |                     |            |                    |
|--------------------------------|----------------------|---------------------|------------|--------------------|----------------------|---------------------|------------|--------------------|----------------------|---------------------|------------|--------------------|
|                                | $E_{\text{red}}$ (v) | $E_{\text{ox}}$ (v) | $\Delta E$ | $E_{\text{m}}$ (v) | $E_{\text{red}}$ (v) | $E_{\text{ox}}$ (v) | $\Delta E$ | $E_{\text{m}}$ (v) | $E_{\text{red}}$ (v) | $E_{\text{ox}}$ (v) | $\Delta E$ | $E_{\text{m}}$ (v) |
| 50                             | -0.555               | -0.490              | -0.065     | -0.522             | -1.548               | -1.486              | -0.062     | -1.517             | -2.185               | -2.115              | -0.070     | -2.150             |
| 100                            | -0.557               | -0.489              | -0.068     | -0.523             | -1.546               | -1.484              | -0.062     | -1.515             | -2.192               | -2.112              | -0.080     | -2.152             |
| 150                            | -0.559               | -0.489              | -0.070     | -0.524             | -1.550               | -1.486              | -0.064     | -1.518             | -2.194               | -2.113              | -0.081     | -2.158             |
| 200                            | -0.553               | -0.487              | -0.066     | -0.520             | -1.548               | -1.484              | -0.064     | -1.516             | -2.185               | -2.115              | -0.070     | -2.150             |
| 250                            | -0.558               | -0.486              | -0.072     | -0.522             | -1.554               | -1.483              | -0.071     | -1.518             | -2.187               | -2.117              | -0.070     | -2.152             |
| 300                            | -0.558               | -0.487              | -0.071     | -0.522             | -1.552               | -1.482              | -0.070     | -1.517             | -2.188               | -2.113              | -0.075     | -2.150             |
| 350                            | -0.559               | -0.485              | -0.074     | -0.522             | -1.557               | -1.481              | -0.076     | -1.519             | -2.192               | -2.119              | -0.073     | -2.156             |
| 400                            | -0.560               | -0.486              | -0.074     | -0.523             | -1.553               | -1.480              | -0.073     | -1.516             | -2.188               | -2.116              | -0.072     | -2.152             |
| 450                            | -0.562               | -0.484              | -0.078     | -0.523             | -1.558               | -1.480              | -0.078     | -1.519             | -2.195               | -2.107              | -0.088     | -2.151             |
| 500                            | -0.560               | -0.484              | -0.076     | -0.522             | -1.554               | -1.479              | -0.075     | -1.516             | -2.191               | -2.104              | -0.087     | -2.148             |
